# Supplementary material for: Drug Combination of Ciprofloxacin and Polymyxin B for the Treatment of Multidrug–Resistant Acinetobacter baumannii Infections: A Drug Pair Limiting the Development of Resistance
Source: Pharmaceutics. 2023 Feb 21;15(3):720. doi: 10.3390/pharmaceutics15030720 (PMC10056848; doi:10.3390/pharmaceutics15030720)
Supplement: Supplementary file 1 [file pharmaceutics-15-00720-s001.zip › Supplymentary materials Genetic_variation.xlsx]

## Sheet: bestsnp
LocusID	Reference	A. baumannii K31	CIP-Sol-1	PMB-CIP-Sol-1	PMB-CIP-Sol-2	PMB-CIP-Sol-3	Control	PMB-Sol	PMB-Sol-CIP-Sol-1	PMB-Sol-CIP-Sol-2	PMB-Sol-CIP-Sol-3	Gene	Codon ref	Codon lineage	Non-synonymous
CP001921::982158	T	C	T	C	C	C	C	C	C	C	C	nucleoside-diphosphate sugar epimerase	GAT	GAC	No
CP001921::520239	A	A	A	A	A	A	A	A	A	G	A	htrB	AAA	GAA	Yes
CP001921::3719370	T	T	G	G	G	G	G	G	G	G	G	Putative transcriptional regulator	ATT	ATG	Yes
CP001921::3697858	T	C	C	C	C	C	C	C	C	C	T	Putative uncharacterized protein	TTT	TCT	Yes
CP001921::3345122	A	G	A	G	G	G	G	G	G	G	G	Putative 3-hydroxybutyryl-CoA epimerase	GTA	GTG	No
CP001921::2722564	T	T	C	C	C	C	C	C	C	C	C	Molybdopterin biosynthesis, protein A	TGG	CGG	Yes
CP001921::2566021	A	C	C	C	C	C	C	C	C	C	A	Phenylacetaldehyde dehydrogenase	ACC	CCC	Yes
CP001921::2385890	T	T	T	T	T	T	T	T	T	A	T	Putative uncharacterized protein	CTT	CAT	Yes
CP001921::1959859	C	T	T	T	T	C	T	T	T	T	T	Porin precursor in catabolism of dicarboxylic acids	TTC	TTT	No
CP001921::1691602	T	C	T	T	T	C	T	T	T	T	T	Pirin-like:Cupin 2 barrel	AGT	AGC	No
CP001921::1554405	G	G	T	G	G	G	G	G	G	G	G	pepN	TTG	TTT	Yes
CP001921::1419029	G	A	A	A	A	A	A	A	A	A	G	proteasome-type protease	GGG	GGA	No
